# Supplementary material for: Phase reduction of coated maghemite (γ-Fe2O3) nanoparticles under microwave-induced plasma heating for rapid heat treatment
Source: Royal Society of Chemistry journal article supplement (doi:10.1039/c1jm12524a), 2011-11-07
Supplement: c1jm12524a.pdf [file c1jm12524a.pdf]

## Supplementary Data

**Table S1** Hyperfine parameters of room temperature Mössbauer spectra for the untreated and treated bare maghemite. The site labelled broad is poorly crystalline, with a broad distribution of  $B_{\text{hf}}$ , the standard deviation of the Voigtian being 3 T.

| Sample                    | Heating time | Phase                          | Site  | $B_{\text{hf}}$ (T) | $\delta$ ( $\text{mm s}^{-1}$ ) | QS ( $\text{mm s}^{-1}$ ) | Area (%) |
|---------------------------|--------------|--------------------------------|-------|---------------------|---------------------------------|---------------------------|----------|
| Untreated maghemite       | nil          | $\gamma\text{-Fe}_2\text{O}_3$ | A     | 47.4(1)             | 0.17(1)                         | -                         | 33       |
|                           |              |                                | B     | 47.6(1)             | 0.46(1)                         | -                         | 41       |
|                           |              |                                | broad | 43.5(3)             | 0.55(1)                         | -                         | 26       |
| Microwaved bare maghemite | 60 s         | $\gamma\text{-Fe}_2\text{O}_3$ | A     | 49.6(1)             | 0.20(1)                         | -                         | 38       |
|                           |              |                                | B     | 49.8(1)             | 0.45(1)                         | -                         | 39       |
|                           |              |                                | broad | 45.8(2)             | 0.36(1)                         | -                         | 22       |
|                           | 180 s        | $\alpha\text{-Fe}_2\text{O}_3$ | A     | 52.1(1)             | 0.38(1)                         | -0.10(1)                  | 100      |

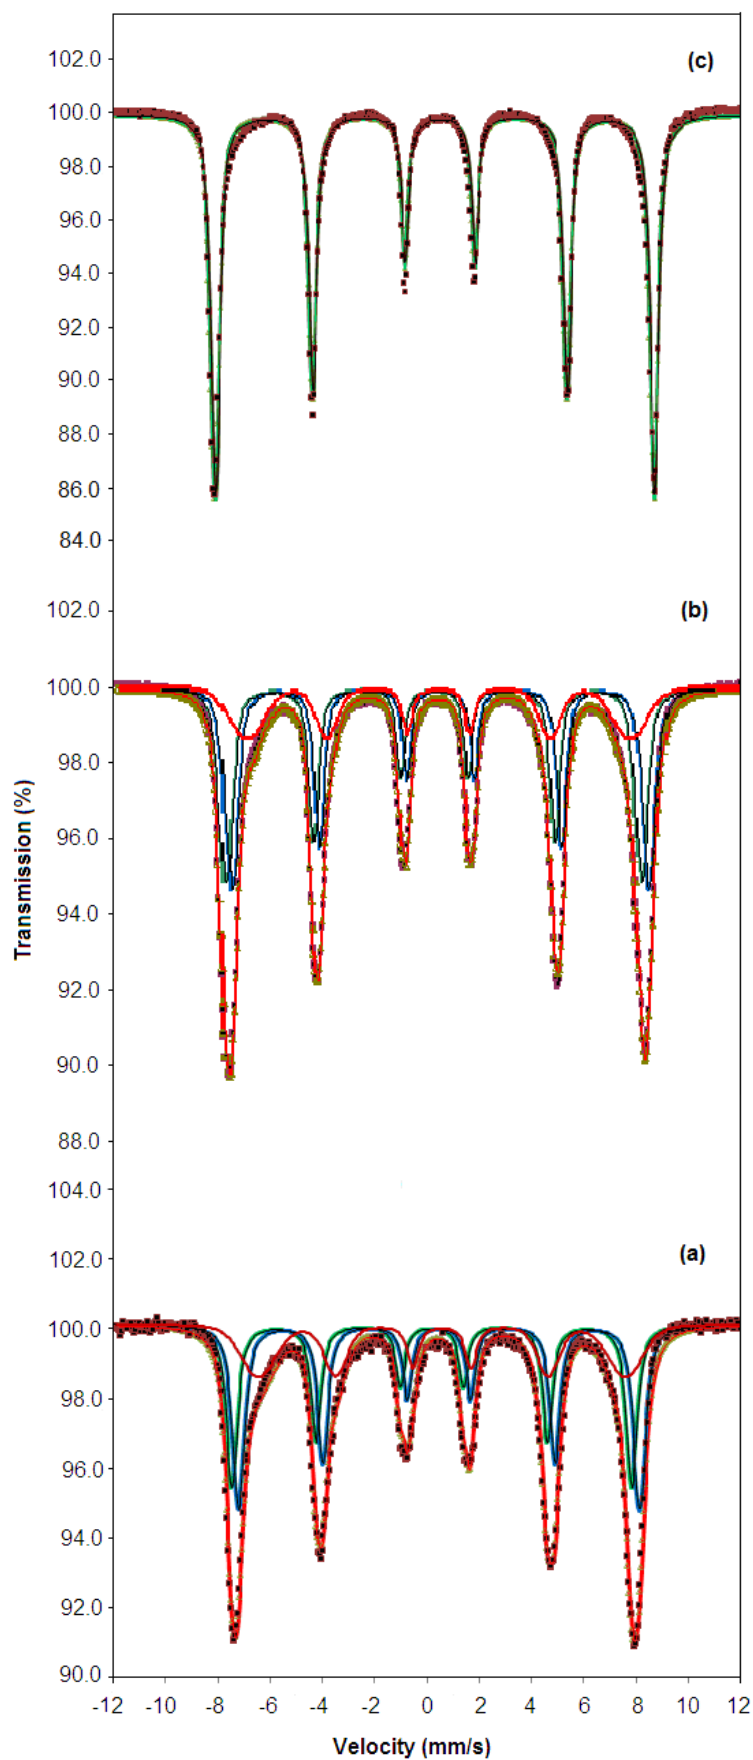

**Figure S1.** Room temperature Mössbauer spectra of (a) original bare maghemite prior to and after microwave heat treatments for (b) 60 s; (c) 180 s.
